# Supplementary material for: Intestinal barrier dysfunction in irritable bowel syndrome: a systematic review
Source: PubMed Central journal article supplement — Ther Adv Gastroenterol. 2021 Feb 24;14:1756284821993586. doi: 10.1177/1756284821993586 (PMC7925957; doi:10.1177/1756284821993586), 2021-02-24
Supplement: sj-pdf-1-tag-10.1177_1756284821993586.pdf [file sj-pdf-1-tag-10.1177_1756284821993586.pdf]

**SUPPLEMENTARY MATERIAL****Search strategy**

The search strategy was designed and conducted by an experienced librarian (LCH, Mayo Clinic) with input from one of the researchers (NH).

A comprehensive search of several databases from inception to March 18, 2020, limited to English language only, and excluding animal studies, was conducted. The databases included Ovid MEDLINE(R) and Epub Ahead of Print, In-Process & Other Non-Indexed Citations and Daily, Ovid Embase, Ovid Cochrane Central Register of Controlled Trials, Ovid Cochrane Database of Systematic Reviews, and Scopus. Controlled vocabulary supplemented with keywords was used to search for studies describing disturbances in the gastrointestinal barrier function in patients with irritable bowel syndrome.

**Search strategy in OVID**

| #  | Searches                                                                                                                                                                                            |
|----|-----------------------------------------------------------------------------------------------------------------------------------------------------------------------------------------------------|
| 1  | Irritable Bowel Syndrome/                                                                                                                                                                           |
| 2  | "irritable bowel".mp.                                                                                                                                                                               |
| 3  | irritable colon/                                                                                                                                                                                    |
| 4  | (colon* adj (spasm or spastic or irritable)).mp.                                                                                                                                                    |
| 5  | ("irritable colon syndrome" or "mucous colitis").mp.                                                                                                                                                |
| 6  | or/1-5                                                                                                                                                                                              |
| 7  | Permeability/                                                                                                                                                                                       |
| 8  | ((gut or colon* or gastric* or gastro* or intestin* or duoden* or epitheli*) adj10 (permeab* or hyperpermeab* or barrier* or wall)).mp.                                                             |
| 9  | "leaky gut".mp.                                                                                                                                                                                     |
| 10 | or/7-9                                                                                                                                                                                              |
| 11 | 6 and 10                                                                                                                                                                                            |
| 12 | Gastrointestinal Tract/pa                                                                                                                                                                           |
| 13 | exp Intestines/pa                                                                                                                                                                                   |
| 14 | gastrointestinal tract/                                                                                                                                                                             |
| 15 | exp pathology/                                                                                                                                                                                      |
| 16 | 14 and 15                                                                                                                                                                                           |
| 17 | 12 or 13 or 16                                                                                                                                                                                      |
| 18 | 6 and 17                                                                                                                                                                                            |
| 19 | exp Intercellular Junctions/                                                                                                                                                                        |
| 20 | Myosin Light Chains/                                                                                                                                                                                |
| 21 | Myosin-Light-Chain Kinase/                                                                                                                                                                          |
| 22 | exp Tight Junction Proteins/                                                                                                                                                                        |
| 23 | ((intercellular or cell* or anchoring or adherens) adj (junction* or connection or bridge)).mp.                                                                                                     |
| 24 | ("tight junction*" or claudin* or occludin* or occluden* or "adherens junction*" or cadherin or desmosomes or hemidesmosome* or mucin or MLCK or "myosin light chain*" or "myosin-light chain").mp. |
| 25 | or/19-24                                                                                                                                                                                            |
| 26 | 6 and 25                                                                                                                                                                                            |

|    |                                                                                                                                                                                                                                                                                                                                                                                                                                                                                                                                                                                                                                                                                                                                                                                                                                                                                                                                                                                                                                                                                                                                                                                                                                                                                                                                                                                                                                                                                                                                                                                                                                                                                                                                                                                                                                                                                                                                                                                                                                                      |
|----|------------------------------------------------------------------------------------------------------------------------------------------------------------------------------------------------------------------------------------------------------------------------------------------------------------------------------------------------------------------------------------------------------------------------------------------------------------------------------------------------------------------------------------------------------------------------------------------------------------------------------------------------------------------------------------------------------------------------------------------------------------------------------------------------------------------------------------------------------------------------------------------------------------------------------------------------------------------------------------------------------------------------------------------------------------------------------------------------------------------------------------------------------------------------------------------------------------------------------------------------------------------------------------------------------------------------------------------------------------------------------------------------------------------------------------------------------------------------------------------------------------------------------------------------------------------------------------------------------------------------------------------------------------------------------------------------------------------------------------------------------------------------------------------------------------------------------------------------------------------------------------------------------------------------------------------------------------------------------------------------------------------------------------------------------|
| 27 | 11 or 18 or 26                                                                                                                                                                                                                                                                                                                                                                                                                                                                                                                                                                                                                                                                                                                                                                                                                                                                                                                                                                                                                                                                                                                                                                                                                                                                                                                                                                                                                                                                                                                                                                                                                                                                                                                                                                                                                                                                                                                                                                                                                                       |
| 28 | ((alpaca or alpacas or amphibian or amphibians or animal or animals or antelope or armadillo or armadillos or avian or baboon or baboons or beagle or beagles or bee or bees or bird or birds or bison or bovine or buffalo or buffaloes or buffalos or "c elegans" or "Caenorhabditis elegans" or camel or camels or canine or canines or carp or cats or cattle or chick or chicken or chickens or chicks or chimp or chimpanze or chimpanzees or chimps or cow or cows or "D melanogaster" or "dairy calf" or "dairy calves" or deer or dog or dogs or donkey or donkeys or drosophila or "Drosophila melanogaster" or duck or duckling or ducklings or ducks or equid or equids or equine or equines or feline or felines or ferret or ferrets or finch or finches or fish or flatworm or flatworms or fox or foxes or frog or frogs or "fruit flies" or "fruit fly" or "G mellonella" or "Galleria mellonella" or geese or gerbil or gerbils or goat or goats or goose or gorilla or gorillas or hamster or hamsters or hare or hares or heifer or heifers or horse or horses or insect or insects or jellyfish or kangaroo or kangaroos or kitten or kittens or lagomorph or lagomorphs or lamb or lambs or llama or llamas or macaque or macaques or macaw or macaws or marmoset or marmosets or mice or minipig or minipigs or mink or minks or monkey or monkeys or mouse or mule or mules or nematode or nematodes or octopus or octopuses or orangutan or "orang-utan" or orangutans or "orang-utans" or oxen or parrot or parrots or pig or pigeon or pigeons or piglet or piglets or pigs or porcine or primate or primates or quail or rabbit or rabbits or rat or rats or reptile or reptiles or rodent or rodents or ruminant or ruminants or salmon or sheep or shrimp or slug or slugs or swine or tamarin or tamarins or toad or toads or trout or urchin or urchins or vole or voles or waxworm or waxworms or worm or worms or xenopus or "zebra fish" or zebrafish) not (human or humans or patient or patients)).ti,ab,hw,kw. |
| 29 | 27 not 28                                                                                                                                                                                                                                                                                                                                                                                                                                                                                                                                                                                                                                                                                                                                                                                                                                                                                                                                                                                                                                                                                                                                                                                                                                                                                                                                                                                                                                                                                                                                                                                                                                                                                                                                                                                                                                                                                                                                                                                                                                            |
| 30 | 29 not ((exp animals/ or exp nonhuman/) not exp humans/)                                                                                                                                                                                                                                                                                                                                                                                                                                                                                                                                                                                                                                                                                                                                                                                                                                                                                                                                                                                                                                                                                                                                                                                                                                                                                                                                                                                                                                                                                                                                                                                                                                                                                                                                                                                                                                                                                                                                                                                             |
| 31 | (letter or conference abstract or editorial or erratum or note or addresses or autobiography or bibliography or biography or blogs or comment or dictionary or directory or interactive tutorial or interview or lectures or legal cases or legislation or news or newspaper article or overall or patient education handout or periodical index or portraits or published erratum or video-audio media or webcasts).mp. [mp=ti, ab, ot, nm, hw, fx, kf, ox, px, rx, ui, sy, sh, kw, tx, ct, tn, dm, mf, dv, dq]                                                                                                                                                                                                                                                                                                                                                                                                                                                                                                                                                                                                                                                                                                                                                                                                                                                                                                                                                                                                                                                                                                                                                                                                                                                                                                                                                                                                                                                                                                                                     |
| 32 | 30 not 31                                                                                                                                                                                                                                                                                                                                                                                                                                                                                                                                                                                                                                                                                                                                                                                                                                                                                                                                                                                                                                                                                                                                                                                                                                                                                                                                                                                                                                                                                                                                                                                                                                                                                                                                                                                                                                                                                                                                                                                                                                            |
| 33 | limit 32 to english language [Limit not valid in CDSR; records were retained]                                                                                                                                                                                                                                                                                                                                                                                                                                                                                                                                                                                                                                                                                                                                                                                                                                                                                                                                                                                                                                                                                                                                                                                                                                                                                                                                                                                                                                                                                                                                                                                                                                                                                                                                                                                                                                                                                                                                                                        |
| 34 | remove duplicates from 33                                                                                                                                                                                                                                                                                                                                                                                                                                                                                                                                                                                                                                                                                                                                                                                                                                                                                                                                                                                                                                                                                                                                                                                                                                                                                                                                                                                                                                                                                                                                                                                                                                                                                                                                                                                                                                                                                                                                                                                                                            |

#### Search strategy in Scopus

| # | Searches                                                                                                                                                   |
|---|------------------------------------------------------------------------------------------------------------------------------------------------------------|
| 1 | TITLE-ABS-KEY ( "irritable bowel" )                                                                                                                        |
| 2 | TITLE-ABS-KEY ( ( colon* W/1 ( spasm OR spastic OR irritable ) ) )                                                                                         |
| 3 | TITLE-ABS-KEY ( "irritable colon syndrome" OR "mucous colitis" )                                                                                           |
| 4 | #1 or #2 or #3                                                                                                                                             |
| 5 | TITLE-ABS-KEY ( ( ( gut OR colon* OR gastric* OR gastro* OR intestin* OR duoden* OR epitheli* ) W/10 ( permeab* OR hyperpermeab* OR barrier* OR wall ) ) ) |
| 6 | TITLE-ABS-KEY ( "leaky gut" )                                                                                                                              |
| 7 | #5 or #6                                                                                                                                                   |
| 8 | #4 and #7                                                                                                                                                  |
| 9 | TITLE-ABS-KEY ( ( ( intercellular OR cell* OR anchoring OR adherens ) W/2 ( junction* OR connection OR bridge ) ) )                                        |

|    |                                                                                                                                                                                                                     |
|----|---------------------------------------------------------------------------------------------------------------------------------------------------------------------------------------------------------------------|
| 10 | TITLE-ABS-KEY ( ( "tight junction*" OR claudin* OR occludin* OR occluden* OR "adherens junction*" OR cadherin OR desmosomes OR hemidesmosome* OR mucin OR mlck OR "myosin light chain*" OR "myosin-light chain" ) ) |
| 11 | #9 or #10                                                                                                                                                                                                           |
| 12 | #4 and #11                                                                                                                                                                                                          |
| 13 | #8 or #12                                                                                                                                                                                                           |
| 14 | INDEX(embase) OR INDEX(medline) OR PMID(0* OR 1* OR 2* OR 3* OR 4* OR 5* OR 6* OR 7* OR 8* OR 9*)                                                                                                                   |
| 15 | #13 and not #14                                                                                                                                                                                                     |
| 16 | DOCTYPE(ed) OR DOCTYPE(bk) OR DOCTYPE(er) OR DOCTYPE(no) OR DOCTYPE(sh) OR DOCTYPE(ch)                                                                                                                              |
| 17 | #15 and not #16                                                                                                                                                                                                     |
| 18 | LANGUAGE(english)                                                                                                                                                                                                   |
| 19 | #17 and #18                                                                                                                                                                                                         |

Supplementary table 1: quality assessment

|                                            | Aims | Study design | Sample size justification | Target population | Sample selection | Selection process | Non-responders | Measurement validity | Measurement reliability | Statistics | Overall methods | Basic data | Response rate | Non-responders 2 | Internal consistency | Overall results | Conclusions | Limitations | Conflicts of interest | Ethical approval | Total score |
|--------------------------------------------|------|--------------|---------------------------|-------------------|------------------|-------------------|----------------|----------------------|-------------------------|------------|-----------------|------------|---------------|------------------|----------------------|-----------------|-------------|-------------|-----------------------|------------------|-------------|
| Reference                                  | Q1   | Q2           | Q3                        | Q4                | Q5               | Q6                | Q7             | Q8                   | Q9                      | Q10        | Q11             | Q12        | Q13           | Q14              | Q15                  | Q16             | Q17         | Q18         | Q19                   | Q20              | Total score |
| In vivo studies – adults                   |      |              |                           |                   |                  |                   |                |                      |                         |            |                 |            |               |                  |                      |                 |             |             |                       |                  |             |
| Lobley et al, 1990 <sup>1</sup>            | 1    | 1            | 0                         | 1                 | 1                | 0                 | 0              | 1                    | 1                       | 1          | 1               | 1          | 0             | 0                | 1                    | 1               | 1           | 0           | 1                     | 1                | 13          |
| Paganelli et al, 1990 <sup>2</sup>         | 1    | 1            | 0                         | 1                 | 1                | 0                 | 1              | 1                    | 1                       | 0          | 0               | 1          | 0             | 0                | 1                    | 1               | 1           | 0           | 0                     | 0                | 11          |
| Spiller et al, 2000 <sup>3</sup>           | 1    | 1            | 0                         | 1                 | 1                | 1                 | 0              | 1                    | 1                       | 1          | 1               | 1          | 0             | 0                | 1                    | 1               | 1           | 1           | 1                     | 1                | 16          |
| Marshall et al, 2004 <sup>4</sup>          | 1    | 1            | 1                         | 1                 | 1                | 1                 | 0              | 1                    | 1                       | 1          | 1               | 1          | 1             | 0                | 1                    | 1               | 1           | 0           | 1                     | 1                | 17          |
| Dunlop et al, 2006 <sup>5</sup>            | 1    | 1            | 0                         | 1                 | 1                | 0                 | 0              | 1                    | 1                       | 1          | 1               | 1          | 0             | 0                | 1                    | 1               | 1           | 1           | 1                     | 1                | 15          |
| Zeng et al, 2008 <sup>6</sup>              | 1    | 1            | 1                         | 1                 | 1                | 1                 | 0              | 1                    | 1                       | 1          | 1               | 1          | 0             | 0                | 1                    | 1               | 1           | 1           | 1                     | 1                | 17          |
| Park et al, 2009 <sup>7</sup>              | 1    | 1            | 0                         | 1                 | 0                | 0                 | 0              | 1                    | 0                       | 1          | 0               | 1          | 0             | 0                | 1                    | 1               | 1           | 0           | 0                     | 1                | 10          |
| Zhou et al, 2009 <sup>8</sup>              | 1    | 1            | 0                         | 1                 | 0                | 0                 | 0              | 1                    | 1                       | 1          | 0               | 1          | 0             | 0                | 1                    | 1               | 1           | 0           | 1                     | 1                | 12          |
| Kerckhoffs et al, 2010 <sup>9</sup>        | 1    | 1            | 0                         | 1                 | 0                | 0                 | 0              | 1                    | 1                       | 1          | 1               | 1          | 1             | 0                | 1                    | 1               | 1           | 0           | 1                     | 1                | 14          |
| Zhou et al, 2010 <sup>10</sup>             | 1    | 1            | 0                         | 1                 | 1                | 0                 | 0              | 1                    | 1                       | 1          | 0               | 1          | 0             | 0                | 1                    | 1               | 1           | 0           | 1                     | 1                | 13          |
| Gecse et al, 2011 <sup>11</sup>            | 1    | 1            | 0                         | 1                 | 1                | 0                 | 0              | 1                    | 1                       | 1          | 1               | 1          | 0             | 0                | 1                    | 1               | 1           | 1           | 1                     | 1                | 15          |
| Mattioli et al, 2011 <sup>12</sup>         | 1    | 1            | 0                         | 1                 | 0                | 0                 | 0              | 1                    | 1                       | 1          | 1               | 1          | 0             | 0                | 1                    | 1               | 1           | 0           | 1                     | 1                | 13          |
| Rao et al, 2011 <sup>13</sup>              | 1    | 1            | 1                         | 1                 | 1                | 0                 | 0              | 1                    | 1                       | 1          | 1               | 1          | 0             | 0                | 1                    | 1               | 1           | 0           | 1                     | 1                | 15          |
| Vazquez et al, 2012 <sup>14</sup>          | 1    | 1            | 1                         | 1                 | 0                | 0                 | 0              | 1                    | 1                       | 1          | 1               | 1          | 0             | 0                | 1                    | 1               | 1           | 1           | 1                     | 1                | 15          |
| Del Valle-Pinero et al, 2013 <sup>15</sup> | 1    | 1            | 0                         | 1                 | 1                | 0                 | 0              | 1                    | 1                       | 1          | 1               | 1          | 0             | 0                | 1                    | 1               | 1           | 1           | 1                     | 0                | 14          |
| Swan et al, 2013 <sup>16</sup>             | 1    | 1            | 1                         | 1                 | 1                | 0                 | 0              | 1                    | 1                       | 1          | 1               | 1          | 0             | 0                | 1                    | 1               | 1           | 0           | 1                     | 1                | 15          |
| Camilleri et al, 2014 <sup>17</sup>        | 1    | 1            | 0                         | 1                 | 1                | 1                 | 0              | 1                    | 1                       | 1          | 0               | 1          | 0             | 0                | 1                    | 0               | 1           | 1           | 1                     | 1                | 14          |
| Keszthelyi et al, 2014 <sup>18</sup>       | 1    | 1            | 1                         | 1                 | 1                | 0                 | 0              | 1                    | 1                       | 1          | 1               | 1          | 0             | 0                | 1                    | 1               | 1           | 1           | 1                     | 1                | 16          |
| Mujagic et al, 2014 <sup>19</sup>          | 1    | 1            | 0                         | 1                 | 1                | 0                 | 0              | 1                    | 1                       | 1          | 1               | 1          | 1             | 0                | 1                    | 1               | 1           | 1           | 1                     | 1                | 16          |
| Zhou et al, 2015 <sup>20</sup>             | 1    | 1            | 0                         | 1                 | 1                | 0                 | 1              | 1                    | 1                       | 1          | 0               | 1          | 0             | 0                | 1                    | 1               | 1           | 0           | 1                     | 1                | 14          |
| Jarrett et al, 2016 <sup>21</sup>          | 1    | 1            | 0                         | 1                 | 0                | 0                 | 1              | 1                    | 1                       | 1          | 1               | 1          | 0             | 0                | 1                    | 1               | 1           | 1           | 1                     | 1                | 15          |
| Li et al, 2016 <sup>22</sup>               | 1    | 1            | 0                         | 1                 | 1                | 0                 | 0              | 1                    | 1                       | 1          | 1               | 1          | 0             | 0                | 1                    | 1               | 1           | 1           | 1                     | 1                | 15          |
| Peters et al, 2017 <sup>23</sup>           | 1    | 1            | 1                         | 1                 | 1                | 0                 | 0              | 1                    | 1                       | 1          | 1               | 1          | 0             | 0                | 1                    | 1               | 1           | 0           | 1                     | 1                | 15          |
| Russo et al, 2017 <sup>24</sup>            | 1    | 1            | 1                         | 1                 | 1                | 1                 | 1              | 1                    | 1                       | 1          | 1               | 1          | 1             | 0                | 1                    | 1               | 1           | 1           | 1                     | 1                | 19          |
| Valentin et al, 2017 <sup>25</sup>         | 1    | 1            | 1                         | 1                 | 1                | 0                 | 0              | 1                    | 1                       | 1          | 1               | 1          | 1             | 0                | 1                    | 1               | 1           | 1           | 1                     | 1                | 17          |
| Linsalata et al, 2018 <sup>26</sup>        | 1    | 1            | 0                         | 1                 | 1                | 1                 | 1              | 1                    | 1                       | 1          | 1               | 1          | 1             | 0                | 1                    | 1               | 1           | 1           | 1                     | 1                | 18          |
| Russo et al, 2018 <sup>27</sup>            | 1    | 1            | 0                         | 1                 | 1                | 1                 | 1              | 1                    | 1                       | 1          | 1               | 1          | 1             | 0                | 1                    | 0               | 1           | 1           | 1                     | 1                | 17          |
| In vivo studies – children                 |      |              |                           |                   |                  |                   |                |                      |                         |            |                 |            |               |                  |                      |                 |             |             |                       |                  |             |

|                                             |   |   |   |   |   |   |   |   |   |   |   |   |   |   |   |   |   |   |   |   |    |
|---------------------------------------------|---|---|---|---|---|---|---|---|---|---|---|---|---|---|---|---|---|---|---|---|----|
| Shulman et al, 2008 <sup>28</sup>           | 1 | 1 | 0 | 1 | 1 | 0 | 0 | 1 | 1 | 1 | 1 | 1 | 0 | 0 | 1 | 1 | 1 | 1 | 1 | 1 | 15 |
| FrancaVilla et al, 2010 <sup>29</sup>       | 1 | 1 | 1 | 1 | 1 | 1 | 1 | 1 | 1 | 1 | 1 | 1 | 1 | 0 | 1 | 1 | 1 | 1 | 1 | 1 | 19 |
| Gervasoni et al, 2016 <sup>30</sup>         | 1 | 1 | 0 | 1 | 0 | 0 | 0 | 1 | 1 | 1 | 0 | 1 | 0 | 0 | 1 | 1 | 1 | 0 | 1 | 1 | 12 |
| Shulman et al, 2020 <sup>31</sup>           | 1 | 1 | 1 | 1 | 1 | 0 | 0 | 1 | 1 | 1 | 0 | 1 | 0 | 0 | 1 | 1 | 1 | 1 | 1 | 1 | 15 |
| In vitro studies – biopsies                 |   |   |   |   |   |   |   |   |   |   |   |   |   |   |   |   |   |   |   |   |    |
| Piche et al, 2009 <sup>32</sup>             | 1 | 1 | 0 | 1 | 1 | 1 | 0 | 1 | 1 | 1 | 1 | 1 | 0 | 0 | 1 | 1 | 1 | 0 | 1 | 1 | 15 |
| Coeffier et al, 2010 <sup>33</sup>          | 1 | 1 | 0 | 1 | 1 | 0 | 0 | 1 | 1 | 1 | 1 | 1 | 0 | 0 | 1 | 1 | 1 | 1 | 1 | 1 | 15 |
| Lee et al, 2010 <sup>34</sup>               | 1 | 1 | 0 | 1 | 1 | 0 | 0 | 1 | 1 | 1 | 1 | 1 | 0 | 0 | 0 | 1 | 1 | 1 | 0 | 1 | 13 |
| Bertiaux-Vandaele et al, 2011 <sup>35</sup> | 1 | 1 | 0 | 1 | 1 | 0 | 1 | 1 | 1 | 1 | 1 | 1 | 0 | 0 | 1 | 1 | 1 | 1 | 1 | 1 | 16 |
| Martinez et al, 2012 <sup>36</sup>          | 1 | 1 | 0 | 1 | 1 | 1 | 0 | 1 | 1 | 1 | 1 | 1 | 0 | 0 | 1 | 1 | 1 | 1 | 1 | 1 | 16 |
| Vivinus-Nebot et al, 2012 <sup>37</sup>     | 1 | 1 | 0 | 1 | 1 | 1 | 0 | 1 | 1 | 1 | 1 | 1 | 0 | 0 | 1 | 1 | 1 | 0 | 1 | 1 | 15 |
| Lee et al, 2013 <sup>38</sup>               | 1 | 1 | 0 | 1 | 1 | 0 | 0 | 1 | 1 | 1 | 1 | 1 | 0 | 0 | 1 | 1 | 1 | 1 | 1 | 1 | 15 |
| Martinez et al, 2013 <sup>39</sup>          | 1 | 1 | 0 | 1 | 1 | 1 | 0 | 1 | 1 | 1 | 1 | 1 | 0 | 0 | 1 | 1 | 1 | 1 | 1 | 1 | 16 |
| Turcotte et al, 2013 <sup>40</sup>          | 1 | 1 | 1 | 1 | 1 | 0 | 1 | 1 | 1 | 1 | 1 | 1 | 1 | 0 | 1 | 1 | 1 | 1 | 1 | 1 | 18 |
| Wilcz-Villega et al, 2013 <sup>41</sup>     | 1 | 1 | 0 | 1 | 0 | 0 | 0 | 1 | 1 | 1 | 1 | 1 | 0 | 0 | 1 | 1 | 1 | 1 | 1 | 1 | 14 |
| Camilleri et al, 2014 <sup>42</sup>         | 1 | 1 | 1 | 1 | 1 | 1 | 0 | 1 | 1 | 1 | 1 | 1 | 0 | 0 | 1 | 1 | 1 | 1 | 1 | 1 | 17 |
| Nebot-Vivinus et al, 2014 <sup>43</sup>     | 1 | 1 | 0 | 1 | 1 | 0 | 0 | 1 | 1 | 1 | 1 | 0 | 0 | 0 | 1 | 1 | 1 | 1 | 1 | 1 | 14 |
| Vivinus-Nebot et al, 2014 <sup>44</sup>     | 1 | 1 | 0 | 1 | 1 | 1 | 0 | 1 | 1 | 1 | 1 | 1 | 0 | 0 | 1 | 1 | 1 | 1 | 1 | 1 | 16 |
| Wilcz-Villega et al, 2014 <sup>45</sup>     | 1 | 1 | 0 | 1 | 1 | 1 | 0 | 1 | 1 | 1 | 1 | 1 | 0 | 0 | 0 | 1 | 1 | 0 | 1 | 1 | 14 |
| Camilleri et al, 2015 <sup>46</sup>         | 1 | 1 | 0 | 1 | 1 | 1 | 0 | 1 | 1 | 1 | 1 | 1 | 0 | 0 | 1 | 1 | 1 | 1 | 1 | 1 | 16 |
| Cheng et al, 2015 <sup>47</sup>             | 1 | 1 | 0 | 1 | 1 | 0 | 0 | 1 | 1 | 1 | 1 | 1 | 0 | 0 | 1 | 1 | 1 | 0 | 1 | 1 | 14 |
| Zhen et al, 2015 <sup>48</sup>              | 1 | 1 | 0 | 1 | 1 | 0 | 0 | 1 | 1 | 1 | 1 | 1 | 0 | 0 | 1 | 1 | 1 | 1 | 1 | 1 | 15 |
| Tulic et al, 2016 <sup>49</sup>             | 1 | 1 | 0 | 1 | 0 | 0 | 0 | 1 | 1 | 1 | 1 | 1 | 0 | 0 | 1 | 1 | 1 | 1 | 1 | 1 | 14 |
| Bednarska et al, 2017 <sup>50</sup>         | 1 | 1 | 0 | 1 | 1 | 0 | 0 | 1 | 1 | 1 | 1 | 1 | 0 | 0 | 1 | 1 | 1 | 0 | 1 | 1 | 14 |
| Ishimoto et al, 2017 <sup>51</sup>          | 1 | 1 | 0 | 1 | 1 | 0 | 0 | 1 | 1 | 1 | 1 | 1 | 0 | 0 | 1 | 1 | 1 | 1 | 1 | 1 | 15 |
| Martinez et al, 2017 <sup>52</sup>          | 1 | 1 | 0 | 1 | 1 | 1 | 0 | 1 | 1 | 1 | 1 | 1 | 0 | 0 | 1 | 1 | 1 | 1 | 1 | 1 | 16 |
| Barbaro et al, 2018 <sup>53</sup>           | 1 | 1 | 0 | 1 | 1 | 1 | 0 | 1 | 1 | 1 | 1 | 1 | 0 | 0 | 1 | 1 | 1 | 1 | 1 | 1 | 16 |
| Lee et al, 2019 <sup>54</sup>               | 1 | 1 | 0 | 1 | 1 | 1 | 0 | 1 | 1 | 1 | 1 | 1 | 0 | 0 | 1 | 1 | 1 | 1 | 1 | 1 | 16 |
| Rodino-Janeiro et al, 2018 <sup>55</sup>    | 1 | 1 | 0 | 1 | 1 | 1 | 0 | 1 | 1 | 1 | 1 | 1 | 0 | 0 | 1 | 1 | 1 | 1 | 1 | 1 | 16 |
| Vidlock et al, 2018 <sup>56</sup>           | 1 | 1 | 1 | 1 | 1 | 0 | 0 | 1 | 1 | 1 | 1 | 1 | 0 | 0 | 1 | 1 | 1 | 1 | 1 | 1 | 16 |
| Fritscher-Ravens et al, 2019 <sup>57</sup>  | 1 | 1 | 1 | 1 | 1 | 0 | 0 | 1 | 1 | 1 | 1 | 1 | 0 | 0 | 1 | 1 | 1 | 1 | 1 | 1 | 16 |
| Witt et al, 2019 <sup>58</sup>              | 1 | 1 | 0 | 1 | 1 | 0 | 0 | 1 | 1 | 1 | 1 | 1 | 0 | 0 | 1 | 1 | 1 | 1 | 1 | 1 | 15 |
| Zhao et al, 2019 <sup>59</sup>              | 1 | 1 | 0 | 1 | 1 | 0 | 0 | 1 | 1 | 1 | 1 | 1 | 0 | 0 | 1 | 1 | 1 | 1 | 1 | 1 | 15 |
| Katinios et al, 2020 <sup>60</sup>          | 1 | 1 | 0 | 1 | 1 | 0 | 0 | 1 | 1 | 1 | 1 | 1 | 0 | 0 | 1 | 1 | 1 | 1 | 1 | 1 | 15 |
| In vitro studies – fecal                    |   |   |   |   |   |   |   |   |   |   |   |   |   |   |   |   |   |   |   |   |    |
| Gecse et al, 2008 <sup>61</sup>             | 1 | 1 | 0 | 1 | 1 | 0 | 0 | 1 | 1 | 1 | 1 | 1 | 0 | 0 | 1 | 1 | 1 | 0 | 1 | 1 | 14 |
| Annahazi et al, 2013 <sup>62</sup>          | 1 | 1 | 0 | 1 | 1 | 0 | 0 | 1 | 1 | 1 | 1 | 1 | 1 | 0 | 0 | 1 | 1 | 0 | 1 | 1 | 14 |
| Crouzet et al, 2013 <sup>63</sup>           | 1 | 1 | 0 | 1 | 0 | 0 | 0 | 1 | 1 | 1 | 1 | 1 | 0 | 0 | 1 | 1 | 1 | 0 | 1 | 1 | 13 |
| De Palma et al, 2017 <sup>64</sup>          | 1 | 1 | 1 | 1 | 1 | 0 | 0 | 1 | 1 | 1 | 1 | 1 | 0 | 0 | 1 | 1 | 1 | 1 | 1 | 1 | 16 |

|                                   |   |   |   |   |   |   |   |   |   |   |   |   |   |   |   |   |   |   |   |   |    |
|-----------------------------------|---|---|---|---|---|---|---|---|---|---|---|---|---|---|---|---|---|---|---|---|----|
| Edogawa et al, 2019 <sup>65</sup> | 1 | 1 | 0 | 1 | 1 | 1 | 0 | 1 | 1 | 1 | 1 | 1 | 0 | 0 | 1 | 1 | 1 | 1 | 1 | 1 | 16 |
| Han et al, 2019 <sup>66</sup>     | 1 | 1 | 0 | 1 | 1 | 0 | 0 | 1 | 1 | 1 | 1 | 0 | 0 | 0 | 1 | 1 | 1 | 1 | 1 | 1 | 14 |

Supplementary table 2: patient characteristics across studies

| Reference                                | Country        | Diagnostic criteria | Group            | N   | Female gender (N (%)) | Age (yr)                    | BMI (kg/m <sup>2</sup> ) | Anxiety and depression                                                        | Symptomatology                                                                                                                                                       | Quality of Life                                                                                                                                                                            |
|------------------------------------------|----------------|---------------------|------------------|-----|-----------------------|-----------------------------|--------------------------|-------------------------------------------------------------------------------|----------------------------------------------------------------------------------------------------------------------------------------------------------------------|--------------------------------------------------------------------------------------------------------------------------------------------------------------------------------------------|
| <i>In vivo studies – adults</i>          |                |                     |                  |     |                       |                             |                          |                                                                               |                                                                                                                                                                      |                                                                                                                                                                                            |
| Lobley et al, 1990 <sup>1</sup>          | United Kingdom | Clinical diagnosis  | IBS <sup>5</sup> | 40  | 87 (61%)              | 16 – 81 <sup>a</sup>        | ND                       | ND                                                                            | ND                                                                                                                                                                   | ND                                                                                                                                                                                         |
|                                          |                |                     | HV               | 40  | 13 (33%)              | 20 – 50 <sup>a</sup>        | ND                       | ND                                                                            | ND                                                                                                                                                                   | ND                                                                                                                                                                                         |
| Paganelli et al, 1990 <sup>2</sup>       | Italy          | Clinical diagnosis  | IBS-D, DSCG      | 7   | 6 (86%)               | 39.4 ± 16.6 <sup>b</sup>    | ND                       | ND                                                                            | ND                                                                                                                                                                   | ND                                                                                                                                                                                         |
|                                          |                |                     | IBS-D, placebo   | 7   | 5 (71%)               | 33.9 ± 7.5 <sup>b</sup>     | ND                       | ND                                                                            | ND                                                                                                                                                                   | ND                                                                                                                                                                                         |
|                                          |                |                     | HV               | 10  | ND                    | ND                          | ND                       | ND                                                                            | ND                                                                                                                                                                   | ND                                                                                                                                                                                         |
| Spiller et al, 2000 <sup>3</sup>         | United Kingdom | Rome I              | IBS              | 10  | 6 (60%)               | ND                          | ND                       | ND                                                                            | ND                                                                                                                                                                   | ND                                                                                                                                                                                         |
|                                          |                |                     | HV               | 10  | ND                    | 25 (22 – 45) <sup>c</sup>   | ND                       | ND                                                                            | ND                                                                                                                                                                   | ND                                                                                                                                                                                         |
| Marshall et al, 2004 <sup>4</sup>        | Canada         | Rome I              | IBS              | 132 | 81 (61%)              | 44.7 (16 – 84) <sup>d</sup> | ND                       | ND                                                                            | ND                                                                                                                                                                   | ND                                                                                                                                                                                         |
|                                          |                |                     | HV               | 86  | 52 (60%)              | 48.9 (17 – 84) <sup>d</sup> | ND                       | ND                                                                            | ND                                                                                                                                                                   | ND                                                                                                                                                                                         |
| Dunlop et al, 2006 (part 1) <sup>5</sup> | United Kingdom | Rome II             | PI-IBS-D         | 15  | 7 (47%)               | 38.5 ± 10.1 <sup>b</sup>    | ND                       | HADS:<br>Anxiety 8.5 ± 4.6 <sup>b</sup><br>Depression 5.3 ± 3.6 <sup>b</sup>  | GSRs:<br>Abdominal pain 11 (8 – 12) <sup>c</sup><br>Indigestion 13 (7 – 17) <sup>c</sup><br>Constipation 6 (5 – 8) <sup>c</sup><br>Diarrhea 10 (7 – 15) <sup>c</sup> | IBS-QOL:<br>Bowel symptoms 41 (34 – 54) <sup>c</sup><br>Activity limitation 15 (14 – 16) <sup>c</sup><br>Fatigue 15 (11 – 18) <sup>c</sup><br>Emotional function 26 (13 – 35) <sup>c</sup> |
|                                          |                |                     | IBS-C            | 15  | 15 (100%)             | 35.1 ± 11.2 <sup>b</sup>    | ND                       | HADS:<br>Anxiety 10.3 ± 4.9 <sup>b</sup><br>Depression 5.5 ± 4.1 <sup>b</sup> | GSRs:<br>Abdominal pain 9 (7 – 13) <sup>c</sup><br>Indigestion 14 (11 – 19) <sup>c</sup><br>Constipation 14 (9 – 17) <sup>c</sup><br>Diarrhea 6 (4 – 6) <sup>c</sup> | IBS-QOL:<br>Bowel symptoms 49 (45 – 57) <sup>c</sup><br>Activity limitation 14 (8 – 17) <sup>c</sup><br>Fatigue 11 (8 – 17) <sup>c</sup><br>Emotional function 28 (17 – 33) <sup>c</sup>   |
|                                          |                |                     | HV               | 15  | 10 (67%)              | 35.9 ± 10.0 <sup>b</sup>    | ND                       | HADS:<br>Anxiety 4.5 ± 3.1 <sup>b</sup><br>Depression 2.5 ± 2.0 <sup>b</sup>  | GSRs:<br>Abdominal pain 4 (3 – 5) <sup>c</sup>                                                                                                                       | IBS-QOL:<br>Bowel symptoms 14 (12 – 16) <sup>c</sup>                                                                                                                                       |
|                                          |                |                     |                  |     |                       |                             |                          |                                                                               |                                                                                                                                                                      |                                                                                                                                                                                            |

|                                          |                 |          |                   |    |              |                           |    |                                                                                                    |                                                                                                              |                                                                                                                              |
|------------------------------------------|-----------------|----------|-------------------|----|--------------|---------------------------|----|----------------------------------------------------------------------------------------------------|--------------------------------------------------------------------------------------------------------------|------------------------------------------------------------------------------------------------------------------------------|
|                                          |                 |          |                   |    |              |                           |    |                                                                                                    | Indigestion 6 (4 – 7) <sup>c</sup><br>Constipation 3 (3 – 4) <sup>c</sup><br>Diarrhea 3 (3 – 3) <sup>c</sup> | Activity limitation 6 (3 – 8) <sup>c</sup><br>Fatigue 4 (4 – 4) <sup>c</sup><br>Emotional function 28 (17 – 33) <sup>c</sup> |
| Dunlop et al, 2006 (part 2) <sup>5</sup> | United Kingdom  | Rome II  | PI-IBS-D          | 15 | 7 (47%)      | 36.6 ± 13.9 <sup>b</sup>  | ND | ND                                                                                                 | ND                                                                                                           | ND                                                                                                                           |
|                                          |                 |          | Non PI-IBS-D      | 15 | 6 or 7 (45%) | 39.5 ± 10.4 <sup>b</sup>  | ND | ND                                                                                                 | ND                                                                                                           | ND                                                                                                                           |
|                                          |                 |          | HV                | 12 | 6 (50%)      | 35.3 ± 5.9 <sup>b</sup>   | ND | ND                                                                                                 | ND                                                                                                           | ND                                                                                                                           |
| Zeng et al, 2008 <sup>6</sup>            | China           | Rome II  | IBS-D, probiotics | 14 | 4 (29%)      | 44.6 ± 12.4 <sup>b</sup>  | ND | ND                                                                                                 | GSRS: 9.6 ± 1.1 <sup>b</sup>                                                                                 | ND                                                                                                                           |
|                                          |                 |          | IBS-D, placebo    | 15 | 6 (40%)      | 45.8 ± 9.2 <sup>b</sup>   | ND | ND                                                                                                 | GSRS: 9.6 ± 1.2 <sup>b</sup>                                                                                 | ND                                                                                                                           |
|                                          |                 |          | HV                | 12 | 9 (75%)      | 44.4 ± 12.8 <sup>b</sup>  | ND | ND                                                                                                 | ND                                                                                                           | ND                                                                                                                           |
| Park et al 2009 <sup>7</sup>             | South Korea     | Rome II  | IBS               | 38 | 20 (52%)     | 40.2 ± 2.6 <sup>b</sup>   | ND | STAI-S: 43.6 ± 1.8 <sup>b</sup><br>STAI-T: 44.3 ± 1.7 <sup>b</sup><br>BDI: 12.6 ± 1.5 <sup>b</sup> | ND                                                                                                           | ND                                                                                                                           |
|                                          |                 |          | HV                | 12 | 5 (42%)      | 37.8 ± 2.6 <sup>b</sup>   | ND | STAI-S: 37.5 ± 2.1 <sup>b</sup><br>STAI-T: 38.6 ± 1.1 <sup>b</sup><br>BDI: 7.0 ± 41.4 <sup>b</sup> | ND                                                                                                           | ND                                                                                                                           |
| Zhou et al, 2009 <sup>8</sup>            | USA             | Rome III | IBS-D             | 54 | 41 (76%)     | 29.5 ± 7.3 <sup>b</sup>   | ND | Exclusion if on SSRIs, TCAs in prior 3 weeks                                                       | FBDSI, increased IP: 100.8 ± 5.4 <sup>b</sup><br>FBDSI, normal IP: 51.6 ± 12.7 <sup>b</sup>                  | ND                                                                                                                           |
|                                          |                 |          | HV                | 22 | 16 (72%)     | 28.3 ± 5.3 <sup>b</sup>   | ND | Exclusion if on SSRIs, TCAs in prior 3 weeks                                                       | FBDSI: 6.1 ± 5.6 <sup>b</sup>                                                                                | ND                                                                                                                           |
| Kerckhoffs et al, 2010 <sup>9</sup>      | The Netherlands | Rome II  | IBS               | 14 | 10 (71%)     | 41 (21 – 63) <sup>d</sup> | ND | ND                                                                                                 | ND                                                                                                           | ND                                                                                                                           |
|                                          |                 |          | HV                | 15 | 8 (53%)      | 31 (21 – 55) <sup>d</sup> | ND | ND                                                                                                 | ND                                                                                                           | ND                                                                                                                           |
| Zhou et al, 2010 <sup>10</sup>           | USA             | Rome III | IBS-D             | 19 | 19 (100%)    | 27 ± 3.3 <sup>b</sup>     | ND | ND                                                                                                 | ND                                                                                                           | ND                                                                                                                           |



|                                            |                |          |                           |    |                     |                           |                         |                                                                                           |                                                                      |                                                      |
|--------------------------------------------|----------------|----------|---------------------------|----|---------------------|---------------------------|-------------------------|-------------------------------------------------------------------------------------------|----------------------------------------------------------------------|------------------------------------------------------|
|                                            |                |          | HV                        | 10 | 10 (100%)           | 29 ± 5.2 <sup>b</sup>     | ND                      | ND                                                                                        | ND                                                                   | ND                                                   |
| Gecse et al, 2011 <sup>11</sup>            | Hungary        | Rome III | IBS-C                     | 12 | 10 (83%)            | 56 (37 – 65) <sup>c</sup> | ND                      | ND                                                                                        | ND                                                                   | ND                                                   |
|                                            |                |          | IBS-D                     | 18 | 12 (67%)            | 49 (25 – 68) <sup>c</sup> | ND                      | ND                                                                                        | ND                                                                   | VAS:<br>45 ± 5 <sup>b</sup>                          |
|                                            |                |          | HV                        | 10 | 8 (80%)             | 49 (38 – 65) <sup>c</sup> | ND                      | ND                                                                                        | ND                                                                   | ND                                                   |
| Mattioli et al, 2011 <sup>12</sup>         | Italy          | Rome III | IBS-C                     | 32 | 21 (66%)            | 48.6 ± 15.4 <sup>b</sup>  | 23.7 ± 3.9 <sup>b</sup> | ND                                                                                        | ND                                                                   | ND                                                   |
|                                            |                |          | HV                        | 23 | 15 (65%)            | 40.5 ± 14.0 <sup>b</sup>  | 22.6 ± 3.9 <sup>b</sup> | ND                                                                                        | ND                                                                   | ND                                                   |
|                                            |                |          | IBS-D                     | 12 | 12 (100%)           | 42.4 ± 3.0 <sup>b</sup>   | 30.9 ± 1.8 <sup>b</sup> | ND                                                                                        | ND                                                                   | ND                                                   |
| Rao et al, 2011 <sup>13</sup>              | USA            | Rome III | HV                        | 12 | 11 (92%)            | 37.4 ± 2.6 <sup>b</sup>   | 24.4 ± 0.8 <sup>b</sup> | ND                                                                                        | ND                                                                   | ND                                                   |
|                                            |                |          | IBS-D, HLA-DQ2/8 positive | 23 | Total IBS: 43 (96%) | 41.5 ± 3.0 <sup>b</sup>   | 30.3 ± 1.7 <sup>b</sup> | ND                                                                                        | Bowel disease questionnaire symptom score 0.422 ± 0.295 <sup>b</sup> | ND                                                   |
|                                            |                |          | IBS-D, HLA-DQ2/8 negative | 22 | Total IBS: 43 (96%) | 44.5 ± 2.5 <sup>b</sup>   | 30.7 ± 2.2 <sup>b</sup> | ND                                                                                        | Bowel disease questionnaire symptom score 0.422 ± 0.295 <sup>b</sup> | ND                                                   |
| Del Valle-Pinero et al, 2013 <sup>15</sup> | USA            | Rome III | IBS                       | 20 | 12 (60%)            | 26.7 ± 6.9 <sup>b</sup>   | 24.5 ± 3.8 <sup>b</sup> | ND                                                                                        | ND                                                                   | ND                                                   |
|                                            |                |          | HV                        | 39 | 19 (49%)            | 27.5 ± 7.0 <sup>b</sup>   | 24.8 ± 5.3 <sup>b</sup> | ND                                                                                        | ND                                                                   | ND                                                   |
|                                            |                |          | IBS-C                     | 18 | 16 (89%)            | 40.6 ± 2.3 <sup>b</sup>   | ND                      | HADS:<br>Anxiety 8.0 (5.0 – 10.0) <sup>c</sup><br>Depression 4.0 (2.0 – 5.0) <sup>c</sup> | PHQ12SSS:<br>7.8 (6.3 – 9.0) <sup>c</sup>                            | ND                                                   |
| Swan et al, 2013 <sup>16</sup>             | United Kingdom | Rome II  | IBS-D                     | 37 | 25 (68%)            | 40.6 ± 2.3 <sup>b</sup>   | ND                      | HADS:<br>Anxiety 7.0 (4.0 – 11.5) <sup>c</sup><br>Depression 4.0 (2.0 – 5.0) <sup>c</sup> | PHQ12SSS:<br>8.0 (5.0 – 11.0) <sup>c</sup>                           | ND                                                   |
|                                            |                |          | HV                        | 26 | 17 (65%)            | 35.0 ± 2.7 <sup>b</sup>   | ND                      | HADS:<br>Anxiety 4.0 (2.5 – 5.5) <sup>c</sup><br>Depression 1.0 (1.0 – 2.0) <sup>c</sup>  | PHQ12SSS:<br>3.0 (1.0 – 4.0) <sup>c</sup>                            | ND                                                   |
|                                            |                |          | IBS-C                     |    | 30 (100%)           | 44.6 ± 1.1 <sup>b</sup>   | 26.6 ± 0.8 <sup>b</sup> | HADS:<br>Anxiety 2.8 ± 0.5 <sup>b</sup>                                                   | ND                                                                   | Psychosomatic symptom score: 0.4 ± 0.06 <sup>b</sup> |

|                                      |                 |          |       |    |                |                  |                  |                                                                                     |                                                                                                                                    |                                               |
|--------------------------------------|-----------------|----------|-------|----|----------------|------------------|------------------|-------------------------------------------------------------------------------------|------------------------------------------------------------------------------------------------------------------------------------|-----------------------------------------------|
|                                      |                 |          |       |    |                |                  |                  | Depression $0.9 \pm 0.2^b$                                                          |                                                                                                                                    |                                               |
|                                      |                 |          | IBS-D | 64 | 59 (92%)       | $41.9 \pm 1.5^b$ | $29.7 \pm 0.9^b$ | HADS:<br>Anxiety $4.0 \pm 0.5^b$<br>Depression $1.6 \pm 0.2^b$                      |                                                                                                                                    | Psychosomatic symptom score: $0.5 \pm 0.04^b$ |
|                                      |                 |          | HV    | 30 | 22 (73%)       | $39.3 \pm 2.1^b$ | $24.5 \pm 0.7^b$ | HADS:<br>Anxiety $2.1 \pm 0.3^b$<br>Depression $0.4 \pm 0.1^b$                      |                                                                                                                                    | Psychosomatic symptom score: $0.2 \pm 0.04^b$ |
| Keszthelyi et al, 2014 <sup>18</sup> | The Netherlands | Rome III | IBS   | 15 | 8 (53%)        | $33 \pm 17^e$    | $24 \pm 4^e$     | Exclusion if presence of psychiatric disorders or on treatments for those           | ND                                                                                                                                 | ND                                            |
|                                      |                 |          | HV    | 15 | 10 (67%)       | $44 \pm 13^e$    | $27 \pm 5^e$     | Exclusion if presence of psychiatric disorders or on treatments for those           | ND                                                                                                                                 | ND                                            |
| Mujagic et al, 2014 <sup>19</sup>    | The Netherlands | Rome III | IBS-C | 21 | 13 (62%)       | $47.5 \pm 3.6^e$ | $25.0 \pm 0.9^e$ | HADS:<br>Anxiety $\geq 8$ in 7 (35%)<br>Depression $\geq 8$ in 4 (21%)              | GSRS:<br>Abdominal pain $3.3 \pm 0.3^e$<br>Indigestion $3.9 \pm 0.3^e$<br>Constipation $3.9 \pm 0.3^e$<br>Diarrhea $2.8 \pm 0.3^e$ | ND                                            |
|                                      |                 |          | IBS-D | 34 | 19 or 20 (57%) | $45.0 \pm 2.4^e$ | $25.6 \pm 1.2^e$ | HADS:<br>Anxiety $\geq 8$ in 15 or 16 (46%)<br>Depression $\geq 8$ in 9 or 10 (29%) | GSRS:<br>Abdominal pain $3.3 \pm 0.2^e$<br>Indigestion $4.2 \pm 0.2^e$<br>Constipation $2.7 \pm 0.2^e$<br>Diarrhea $4.0 \pm 0.2^e$ | ND                                            |

|                                   |       |          |       |     |              |                          |                         |                                                                                                                                                                                                                                                                        |                                                                                                                                                                            |                                                                                                                   |
|-----------------------------------|-------|----------|-------|-----|--------------|--------------------------|-------------------------|------------------------------------------------------------------------------------------------------------------------------------------------------------------------------------------------------------------------------------------------------------------------|----------------------------------------------------------------------------------------------------------------------------------------------------------------------------|-------------------------------------------------------------------------------------------------------------------|
|                                   |       |          | IBS-M | 30  | 21 (70%)     | 42.2 ± 3.1 <sup>e</sup>  | 25.4 ± 0.7 <sup>e</sup> | HADS:<br>Anxiety ≥ 8 in 11<br>or 11 (36%)<br>Depression ≥ 8 in<br>5 or 6 (17%)                                                                                                                                                                                         | GSRS:<br>Abdominal pain<br>3.2 ± 0.2 <sup>e</sup><br>Indigestion 4.2 ±<br>0.2 <sup>e</sup><br>Constipation 3.8<br>± 0.2 <sup>e</sup><br>Diarrhea 3.7 ±<br>0.3 <sup>e</sup> | ND                                                                                                                |
|                                   |       |          | HV    | 94  | 55 (59%)     | 45.0 ± 2.0 <sup>e</sup>  | 23.8 ± 0.5 <sup>e</sup> | HADS:<br>Anxiety ≥ 8 in 11<br>or 12 (12%)<br>Depression ≥ 8 in<br>7 or 8 (8%)                                                                                                                                                                                          | GSRS:<br>Abdominal pain<br>1.6 ± 0.1 <sup>e</sup><br>Indigestion 1.9 ±<br>0.1 <sup>e</sup><br>Constipation 1.6<br>± 0.1 <sup>e</sup><br>Diarrhea 1.4 ±<br>0.1 <sup>e</sup> | ND                                                                                                                |
| Zhou et al, 2015 <sup>20</sup>    | USA   | Rome III | IBS-C | 74  | 54 (73%)     | 30.4 ± 4.3 <sup>b</sup>  | ND                      | ND                                                                                                                                                                                                                                                                     | ND                                                                                                                                                                         | ND                                                                                                                |
|                                   |       |          | IBS-D | 109 | 75 (69%)     | 28.6 ± 2.9 <sup>b</sup>  | ND                      | ND                                                                                                                                                                                                                                                                     | ND                                                                                                                                                                         | ND                                                                                                                |
|                                   |       |          | HV    | 36  | 26 (72%)     | 31.5 ± 3.6 <sup>b</sup>  | ND                      | ND                                                                                                                                                                                                                                                                     | ND                                                                                                                                                                         | ND                                                                                                                |
| Jarrett et al, 2016 <sup>21</sup> | USA   | Rome III | IBS   | 85  | 75 (88%)     | 39.2 ± 15.3 <sup>b</sup> | ND                      | Exclusion if<br>presence of<br>current mental<br>health disorders                                                                                                                                                                                                      | ND                                                                                                                                                                         | 70.3 ± 14.2 <sup>b</sup>                                                                                          |
| Li et al, 2016 <sup>22</sup>      | China | Rome III | IBS-D | 40  | 16 (40%)     | 37.3 ± 12.1 <sup>b</sup> | 22.4 ± 3.1 <sup>b</sup> | HADS, increased<br>sIP:<br>Total 16.0 ± 8.1 <sup>b</sup><br>Anxiety 8.1 ± 4.3 <sup>b</sup><br>Depression 7.9 ±<br>4.7 <sup>b</sup><br><br>HADS, normal sIP:<br>Total 10.1 ± 5.9 <sup>b</sup><br>Anxiety 6.3 ± 3.3 <sup>b</sup><br>Depression 4.1 ±<br>2.6 <sup>b</sup> | GSRS, increased<br>sIP:<br>Mild (42%);<br>Moderate (42%);<br>Severe (16%)<br><br>GSRS, normal<br>sIP:<br>Mild (62%);<br>Moderate (33%);<br>Severe (5%)                     | IBS-QOL, increased<br>sIP:<br>68.2 ± 19.0 <sup>b</sup><br><br>IBS-QOL, normal<br>sIP:<br>79.7 ± 14.3 <sup>b</sup> |
|                                   |       |          | HV    | 10  | 4 (40%)      | 36.5 ± 14.1 <sup>b</sup> | 21.5 ± 1.8 <sup>b</sup> | ND                                                                                                                                                                                                                                                                     | ND                                                                                                                                                                         | ND                                                                                                                |
| Peters et al, 2017 <sup>23</sup>  | USA   | Rome III | IBS-C | 19  | 19<br>(100%) | 45.4 ± 2.8 <sup>e</sup>  | -                       | HADS:<br>Anxiety 3.4 ± 0.5 <sup>e</sup>                                                                                                                                                                                                                                | SSS:<br>207 ± 18 <sup>e</sup>                                                                                                                                              | IBS-QOL<br>32.3 ± 2.6 <sup>e</sup>                                                                                |

|                                     |       |          |       |    |           |                          |                         |                                                                              |                                                                                                                              |    |
|-------------------------------------|-------|----------|-------|----|-----------|--------------------------|-------------------------|------------------------------------------------------------------------------|------------------------------------------------------------------------------------------------------------------------------|----|
|                                     |       |          |       |    |           |                          |                         | Depression 1.1 ± 0.4 <sup>e</sup>                                            |                                                                                                                              |    |
|                                     |       |          | HV    | 18 | 18 (100%) | 43.1 ± 2.8 <sup>e</sup>  | -                       | HADS:<br>Anxiety 2.6 ± 0.5 <sup>e</sup><br>Depression 0.4 ± 0.4 <sup>e</sup> | -                                                                                                                            | -  |
| Russo et al, 2017 <sup>24</sup>     | Italy | Rome III | IBS-D | 28 | 26 (93%)  | 40.8 ± 2.3 <sup>e</sup>  | 23.5 ± 0.7 <sup>e</sup> | Exclusion if presence major psychiatric disorders                            | Inclusion if GSRS-IBS ≥ 3.0                                                                                                  | ND |
|                                     |       |          | HV    | 19 | 13 (68%)  | 39.7 ± 3.3 <sup>e</sup>  | 25.0 ± 1.0 <sup>e</sup> | Exclusion if presence of major psychiatric disorders                         | ND                                                                                                                           | ND |
| Valentin et al, 2017 <sup>25</sup>  | USA   | Rome III | IBS-D | 15 | 13 (87%)  | 40.3 ± 2.3 <sup>b</sup>  | 34.3 ± 3.0 <sup>b</sup> | Exclusion if presence of uncontrolled psychiatric disorder                   | ND                                                                                                                           |    |
|                                     |       |          | HV    | 12 | ND        | ND                       | ND                      | ND                                                                           | ND                                                                                                                           | ND |
| Linsalata et al, 2018 <sup>26</sup> | Italy | Rome III | IBS-D | 39 | 33 (85%)  | 40.1 ± 12.2 <sup>b</sup> | 23.9 ± 3.3 <sup>b</sup> | Exclusion if presence of major psychiatric disorders                         | GSRS:<br>Abdominal pain 14 (6 – 25) <sup>c</sup><br>Indigestion 19 (7 – 38) <sup>c</sup><br>Diarrhea 5 (3 – 21) <sup>c</sup> | ND |
|                                     |       |          | HV    |    | 13 (65%)  | 39.7 ± 7.2 <sup>b</sup>  | 23.8 ± 2.9 <sup>b</sup> | Exclusion if presence of major psychiatric disorders                         | GSRS:<br>Abdominal pain 6 (0 – 6) <sup>c</sup><br>Indigestion 6 (6 – 6) <sup>c</sup><br>Diarrhea 3 (3 – 3) <sup>c</sup>      | ND |
| Russo et al, 2018 <sup>27</sup>     | Italy | Rome III | IBS-D | 34 | 30 (88%)  | 41.2 ± 2.1 <sup>e</sup>  | 25.1 ± 0.9 <sup>e</sup> | Exclusion if presence of major psychiatric disorders                         | GSRS:<br>Abdominal pain 13 (6 – 25) <sup>c</sup><br>Indigestion 19 (7 – 38) <sup>c</sup>                                     | ND |

|                                       |       |          |                                                |    |          |                         |                         |                                                      |                                                                                                                         |                    |
|---------------------------------------|-------|----------|------------------------------------------------|----|----------|-------------------------|-------------------------|------------------------------------------------------|-------------------------------------------------------------------------------------------------------------------------|--------------------|
|                                       |       |          |                                                |    |          |                         |                         |                                                      | Diarrhea 5 (3 – 21) <sup>c</sup>                                                                                        |                    |
|                                       |       |          | HV                                             | 17 | 12 (71%) | 39.5 ± 2.9 <sup>e</sup> | 24.3 ± 0.4 <sup>e</sup> | Exclusion if presence of major psychiatric disorders | GSRS:<br>Abdominal pain 6 (6 – 6) <sup>c</sup><br>Indigestion 6 (6 – 6) <sup>c</sup><br>Diarrhea 3 (3 – 3) <sup>c</sup> | ND                 |
| In vivo studies – children            |       |          |                                                |    |          |                         |                         |                                                      |                                                                                                                         |                    |
| Shulman et al, 2008 <sup>28</sup>     | USA   | Rome II  | IBS or FAP                                     | 93 | 65 (71%) | 8.2 ± 1.4 <sup>b</sup>  | ND                      | ND                                                   | ND                                                                                                                      | ND                 |
|                                       |       |          | HV                                             | 52 | 39 (73%) | 8.5 ± 1.3 <sup>b</sup>  | ND                      | ND                                                   | ND                                                                                                                      | ND                 |
| Francavilla et al, 2010 <sup>29</sup> | Italy | Rome II  | IBS or FAP, treated with LGG <sup>§§</sup>     | 67 | 24 (36%) | 6.5 ± 2.1 <sup>b</sup>  | ND                      | ND                                                   | ND                                                                                                                      | School absenteeism |
|                                       |       |          | IBS or FAP, treated with placebo <sup>§§</sup> | 69 | 23 (33%) | 6.3 ± 2.0 <sup>b</sup>  | ND                      | ND                                                   | ND                                                                                                                      | School absenteeism |
|                                       |       |          | HV                                             | 55 | 25 (45%) | 5 – 12 <sup>a</sup>     | ND                      | ND                                                   | ND                                                                                                                      | ND                 |
| Gervasoni et al, 2016 <sup>30</sup>   | Italy | Rome III | IBS                                            | 15 | 7 (47%)  | 5 – 16 <sup>a</sup>     | ND                      | ND                                                   | ND                                                                                                                      | ND                 |
|                                       |       |          | HV                                             | 10 | 6 (60%)  | 5 – 16 <sup>a</sup>     | ND                      | ND                                                   | ND                                                                                                                      | ND                 |
| Shulman et al, 2020 <sup>31</sup>     | USA   | Rome III | IBS                                            | 95 | 59 (62%) | 9.4 ± 1.5 <sup>b</sup>  | ND                      | ND                                                   | ND                                                                                                                      | ND                 |
|                                       |       |          | FAP                                            | 25 | 15 (60%) | 9.2 ± 1.7 <sup>b</sup>  | ND                      | ND                                                   | ND                                                                                                                      | ND                 |
|                                       |       |          | HV                                             | 60 | 10 (40%) | 9.7 ± 1.6 <sup>b</sup>  | ND                      | ND                                                   | ND                                                                                                                      | ND                 |

<sup>a</sup> range; <sup>b</sup> mean ± standard deviation; <sup>c</sup> median (range); <sup>d</sup> mean (range); <sup>e</sup> mean ± standard error of the mean.

<sup>§</sup> Characteristics of overall patient population, describing patients with several GI diseases (n = 143), 28% is IBS.

<sup>§§</sup> Only 54 out of 136 children with IBS or FAP completed IP measurements (40%).

BDI, Beck depression inventory; BMI, body mass index; DSCG, disodium cromoglycate; FAP, functional abdominal pain; FBDSI, functional bowel disorder severity index; GSRS, gastrointestinal symptom rating scale; HADS, hospital anxiety and depression scale; HLA-DQ2/8, human leukocyte antigen serotype 2 and/or 8; HV, healthy volunteer; IBS, irritable bowel syndrome; IBS-C, irritable bowel syndrome with constipation; IBS-D, irritable bowel syndrome with diarrhea; IBS-QOL, irritable bowel syndrome - quality of life; IP, intestinal permeability; LGG, *Lactobacillus rhamnosus* GG; ND, not described; PHQ12SSS, patient health questionnaire 12 somatic symptom scale; PI-IBS, post-infection irritable bowel syndrome; sIP, small intestinal permeability; SSRI, selective serotonin reuptake inhibitor; SSS, symptom severity scale; STAI-S, state-trait anxiety inventory – state component; STAI-T, state-trait anxiety inventory – trait component; TCA, tricyclic antidepressants; VAS, visual analogue scale

## References

1. Lobley RW, Burrows PC, Warwick R, Dawson DJ and Holmes R. Simultaneous assessment of intestinal permeability and lactose tolerance with orally administered raffinose, lactose and L-arabinose. *Clin Sci (Lond)*. 1990; 79: 175-83.
2. Paganelli R, Fagiolo U, Cancian M, Sturniolo GC, Scala E and D'Offizi GP. Intestinal permeability in irritable bowel syndrome. Effect of diet and sodium cromoglycate administration. *Ann Allergy*. 1990; 64: 377-80.
3. Spiller RC, Jenkins D, Thornley JP, et al. Increased rectal mucosal enteroendocrine cells, T lymphocytes, and increased gut permeability following acute Campylobacter enteritis and in post-dysenteric irritable bowel syndrome. *Gut*. 2000; 47: 804-11.
4. Marshall JK, Thabane M, Garg AX, et al. Intestinal permeability in patients with irritable bowel syndrome after a waterborne outbreak of acute gastroenteritis in Walkerton, Ontario. *Aliment Pharmacol Ther*. 2004; 20: 1317-22.
5. Dunlop SP, Hebden J, Campbell E, et al. Abnormal intestinal permeability in subgroups of diarrhea-predominant irritable bowel syndromes. *Am J Gastroenterol*. 2006; 101: 1288-94.
6. Zeng J, Li YQ, Zuo XL, Zhen YB, Yang J and Liu CH. Clinical trial: effect of active lactic acid bacteria on mucosal barrier function in patients with diarrhoea-predominant irritable bowel syndrome. *Aliment Pharmacol Ther*. 2008; 28: 994-1002.
7. Park JH, Park DI, Kim HJ, et al. The Relationship between Small-Intestinal Bacterial Overgrowth and Intestinal Permeability in Patients with Irritable Bowel Syndrome. *Gut Liver*. 2009; 3: 174-9.
8. Zhou Q, Zhang B and Nicholas Verne G. Intestinal membrane permeability and hypersensitivity in the irritable bowel syndrome. *Pain*. 2009; 146: 41-6.
9. Kerckhoffs AP, Akkermans LM, de Smet MB, et al. Intestinal permeability in irritable bowel syndrome patients: effects of NSAIDs. *Digestive diseases and sciences*. 2010; 55: 716-23.
10. Zhou Q, Souba WW, Croce CM and Verne GN. MicroRNA-29a regulates intestinal membrane permeability in patients with irritable bowel syndrome. *Gut*. 2010; 59: 775-84.
11. Gecse K, Roka R, Sera T, et al. Leaky Gut in Patients with Diarrhea-Predominant Irritable Bowel Syndrome and Inactive Ulcerative Colitis. *Digestion*. 2011; 85: 40-6.
12. Mattioli F, Fucile C, Marini V, et al. Assessment of intestinal permeability using sugar probes: influence of urinary volume. *Clin Lab*. 2011; 57: 909-18.
13. Rao AS, Camilleri M, Eckert DJ, et al. Urine sugars for in vivo gut permeability: validation and comparisons in irritable bowel syndrome-diarrhea and controls. *Am J Physiol Gastrointest Liver Physiol*. 2011; 301: G919-28.
14. Vazquez-Roque MI, Camilleri M, Smyrk T, et al. Association of HLA-DQ gene with bowel transit, barrier function, and inflammation in irritable bowel syndrome with diarrhea. *Am J Physiol Gastrointest Liver Physiol*. 2012; 303: G1262-9.
15. Del Valle-Pinero AY, Van Deventer HE, Fourie NH, et al. Gastrointestinal permeability in patients with irritable bowel syndrome assessed using a four probe permeability solution. *Clin Chim Acta*. 2013; 418: 97-101.

16. Swan C, Duroudier NP, Campbell E, et al. Identifying and testing candidate genetic polymorphisms in the irritable bowel syndrome (IBS): association with TNFSF15 and TNF $\alpha$ . *Gut*. 2013; 62: 985-94.
17. Camilleri M, Shin A, Busciglio I, et al. Validating biomarkers of treatable mechanisms in irritable bowel syndrome. *Neurogastroenterol Motil*. 2014; 26: 1677-85.
18. Keszthelyi D, Troost FJ, Jonkers DM, et al. Serotonergic reinforcement of intestinal barrier function is impaired in irritable bowel syndrome. *Aliment Pharmacol Ther*. 2014; 40: 392-402.
19. Mujagic Z, Ludidi S, Keszthelyi D, et al. Small intestinal permeability is increased in diarrhoea predominant IBS, while alterations in gastroduodenal permeability in all IBS subtypes are largely attributable to confounders. *Aliment Pharmacol Ther*. 2014; 40: 288-97.
20. Zhou Q, Costinean S, Croce CM, et al. MicroRNA 29 targets nuclear factor- $\kappa$ B-repressing factor and Claudin 1 to increase intestinal permeability. *Gastroenterology*. 2015; 148: 158-69.e8.
21. Jarrett ME, Cain KC, Barney PG, et al. Balance of Autonomic Nervous System Predicts Who Benefits from a Self-management Intervention Program for Irritable Bowel Syndrome. *J Neurogastroenterol Motil*. 2016; 22: 102-11.
22. Li L, Xiong L, Yao J, et al. Increased small intestinal permeability and RNA expression profiles of mucosa from terminal ileum in patients with diarrhoea-predominant irritable bowel syndrome. *Digestive and liver disease : official journal of the Italian Society of Gastroenterology and the Italian Association for the Study of the Liver*. 2016; 48: 880-7.
23. Peters SA, Edogawa S, Sundt WJ, et al. Constipation-Predominant Irritable Bowel Syndrome Females Have Normal Colonic Barrier and Secretory Function. *Am J Gastroenterol*. 2017; 112: 913-23.
24. Russo F, Chimienti G, Linsalata M, Clemente C, Orlando A and Riezzo G. The obestatin/ghrelin ratio and ghrelin genetics in adult celiac patients before and after a gluten-free diet, in irritable bowel syndrome patients and healthy individuals. *Eur J Gastroenterol Hepatol*. 2017; 29: 160-8.
25. Valentin N, Camilleri M, Carlson P, et al. Potential mechanisms of effects of serum-derived bovine immunoglobulin/protein isolate therapy in patients with diarrhea-predominant irritable bowel syndrome. *Physiol Rep*. 2017; 5.
26. Linsalata M, Riezzo G, D'Attoma B, Clemente C, Orlando A and Russo F. Noninvasive biomarkers of gut barrier function identify two subtypes of patients suffering from diarrhoea predominant-IBS: a case-control study. *BMC Gastroenterol*. 2018; 18: 167.
27. Russo F, Chimienti G, Riezzo G, et al. Adipose Tissue-Derived Biomarkers of Intestinal Barrier Functions for the Characterization of Diarrhoea-Predominant IBS. *Dis Markers*. 2018; 2018: 1827937.
28. Shulman RJ, Eakin MN, Czyzewski DI, Jarrett M and Ou C-N. Increased gastrointestinal permeability and gut inflammation in children with functional abdominal pain and irritable bowel syndrome. *J Pediatr*. 2008; 153: 646-50.
29. Francavilla R, Miniello V, Magistà AM, et al. A randomized controlled trial of Lactobacillus GG in children with functional abdominal pain. *Pediatrics*. 2010; 126: e1445-52.
30. Gervasoni J, Schiattarella A, Giorgio V, et al. Validation of an LC-MS/MS Method for Urinary Lactulose and Mannitol Quantification: Results in Patients with Irritable Bowel Syndrome. *Dis Markers*. 2016; 2016: 5340386.
31. Shulman RJ, Devaraj S and Heitkemper M. Gut permeability is affected by sex and increased in children with irritable bowel syndrome but not in functional abdominal pain. *Neurogastroenterol Motil*. 2020; 32: e13765.

32. Piche T, Barbara G, Aubert P, et al. Impaired Intestinal barrier integrity in the colon of patients with irritable bowel syndrome: Involvement of soluble mediators. *Gut*. 2009; 58: 196-201.
33. Coeffier M, Gloro R, Boukhattala N, et al. Increased proteasome-mediated degradation of occludin in irritable bowel syndrome. *American Journal of Gastroenterology*. 2010; 105: 1181-8.
34. Lee JW, Park JH, Park DIL, et al. Subjects with diarrhea-predominant IBS have increased rectal permeability responsive to tryptase. *Digestive Diseases & Sciences*. 2010; 55: 2922-8.
35. Bertiaux-Vandaele N, Youmba SB, Belmonte L, et al. The expression and the cellular distribution of the tight junction proteins are altered in irritable bowel syndrome patients with differences according to the disease subtype. *American Journal of Gastroenterology*. 2011; 106: 2165-73.
36. Martínez C, Vicario M, Ramos L, et al. The jejunum of diarrhea-predominant irritable bowel syndrome shows molecular alterations in the tight junction signaling pathway that are associated with mucosal pathobiology and clinical manifestations. *Am J Gastroenterol*. 2012; 107: 736-46.
37. Vivinus-Nébot M, Dainese R, Anty R, et al. Combination of allergic factors can worsen diarrheic irritable bowel syndrome: role of barrier defects and mast cells. *Am J Gastroenterol*. 2012; 107: 75-81.
38. Lee H, Park JH, Park DI, et al. Mucosal mast cell count is associated with intestinal permeability in patients with diarrhea predominant irritable bowel syndrome. *J Neurogastroenterol Motil*. 2013; 19: 244-50.
39. Martínez C, Lobo B, Pigrau M, et al. Diarrhoea-predominant irritable bowel syndrome: an organic disorder with structural abnormalities in the jejunal epithelial barrier. *Gut*. 2013; 62: 1160-8.
40. Turcotte JF, Kao D, Mah SJ, et al. Breaks in the wall: increased gaps in the intestinal epithelium of irritable bowel syndrome patients identified by confocal laser endomicroscopy (with videos). *Gastrointest Endosc*. 2013; 77: 624-30.
41. Wilcz-Villega EM, McClean S and O'Sullivan MA. Mast cell tryptase reduces junctional adhesion molecule-A (JAM-A) expression in intestinal epithelial cells: Implications for the mechanisms of barrier dysfunction in irritable bowel syndrome. *American Journal of Gastroenterology*. 2013; 108: 1140-51.
42. Camilleri M, Shin A, Busciglio IA, et al. GPBAR1 genotype predicts bowel function and pathophysiology in diarrhea-predominant irritable bowel syndrome. *Gastroenterology*. 2014; 146: S-109.
43. Nébot-Vivinus M, Harkat C, Bziouche H, et al. Multispecies probiotic protects gut barrier function in experimental models. *World J Gastroenterol*. 2014; 20: 6832-43.
44. Vivinus-Nébot M, Frin-Mathy G, Bziouche H, et al. Functional bowel symptoms in quiescent inflammatory bowel diseases: role of epithelial barrier disruption and low-grade inflammation. *Gut*. 2014; 63: 744-52.
45. Wilcz-Villega E, McClean S and O'Sullivan M. Reduced E-cadherin expression is associated with abdominal pain and symptom duration in a study of alternating and diarrhea predominant IBS. *Neurogastroenterol Motil*. 2014; 26: 316-25.
46. Camilleri M, Carlson P, Acosta A and Busciglio I. Colonic mucosal gene expression and genotype in irritable bowel syndrome patients with normal or elevated fecal bile acid excretion. *Am J Physiol Gastrointest Liver Physiol*. 2015; 309: G10-20.
47. Cheng P, Yao J, Wang C, Zhang L and Kong W. Molecular and cellular mechanisms of tight junction dysfunction in the irritable bowel syndrome. *Mol Med Report*. 2015; 12: 3257-64.



48. Zhen Y, Chu C, Zhou S, Qi M and Shu R. Imbalance of tumor necrosis factor- $\alpha$ , interleukin-8 and interleukin-10 production evokes barrier dysfunction, severe abdominal symptoms and psychological disorders in patients with irritable bowel syndrome-associated diarrhea. *Mol Med Rep.* 2015; 12: 5239-45.
49. Tulic MK, Vivinus-Nebot M, Rekima A, et al. Presence of commensal house dust mite allergen in human gastrointestinal tract: a potential contributor to intestinal barrier dysfunction. *Gut.* 2016; 65: 757-66.
50. Bednarska O, Walter SA, Casado-Bedmar M, et al. Vasoactive Intestinal Polypeptide and Mast Cells Regulate Increased Passage of Colonic Bacteria in Patients With Irritable Bowel Syndrome. *Gastroenterology.* 2017; 153: 948-60.e3.
51. Ishimoto H, Oshima T, Sei H, et al. Claudin-2 expression is upregulated in the ileum of diarrhea predominant irritable bowel syndrome patients. *J Clin Biochem Nutr.* 2017; 60: 146-50.
52. Wohlfarth C, Schmitteckert S, Hartle JD, et al. miR-16 and miR-103 impact 5-HT4 receptor signalling and correlate with symptom profile in irritable bowel syndrome. *Sci.* 2017; 7: 14680.
53. Barbaro MR, Fuschi D, Carapelle M, et al. Restoring epithelial barrier in irritable bowel syndrome: The potential role of escherichia coli nissle 1917. *United European Gastroenterology Journal.* 2018; 6 (8 Supplement): A15.
54. Lee JY, Kim N, Park JH, et al. Expression of Neurotrophic Factors, Tight Junction Proteins, and Cytokines According to Irritable Bowel Syndrome Subtype and Sex. *Journal of neurogastroenterology and motility.* 2019; 18: 18.
55. Rodiño-Janeiro BK, Martínez C, Fortea M, et al. Decreased TESK1-mediated cofilin 1 phosphorylation in the jejunum of IBS-D patients may explain increased female predisposition to epithelial dysfunction. *Sci Rep.* 2018; 8: 2255.
56. Videlock EJ, Mahurkar-Joshi S, Hoffman JM, et al. Sigmoid colon mucosal gene expression supports alterations of neuronal signaling in irritable bowel syndrome with constipation. *Am J Physiol Gastrointest Liver Physiol.* 2018; 315: G140-g57.
57. Fritscher-Ravens A, Pflaum T, Mössinger M, et al. Many Patients With Irritable Bowel Syndrome Have Atypical Food Allergies Not Associated With Immunoglobulin E. *Gastroenterology.* 2019; 157: 109-18.e5.
58. Witt ST, Bednarska O, Keita Å V, et al. Interactions between gut permeability and brain structure and function in health and irritable bowel syndrome. *Neuroimage Clin.* 2019; 21: 101602.
59. Zhao DY, Qi QQ, Long X, et al. Ultrastructure of intestinal mucosa in diarrhea-predominant irritable bowel syndrome. *Physiol Int.* 2019; 106: 225-35.
60. Katinios G, Casado-Bedmar M, Walter SA, et al. Increased Colonic Epithelial Permeability and Mucosal Eosinophilia in Ulcerative Colitis in Remission Compared With Irritable Bowel Syndrome and Health. *Inflamm Bowel Dis.* 2020.
61. Gecse K, Róka R, Ferrier L, et al. Increased faecal serine protease activity in diarrhoeic IBS patients: a colonic luminal factor impairing colonic permeability and sensitivity. *Gut.* 2008; 57: 591-9.
62. Annaházi A, Ferrier L, Bézirard V, et al. Luminal cysteine-proteases degrade colonic tight junction structure and are responsible for abdominal pain in constipation-predominant IBS. *Am J Gastroenterol.* 2013; 108: 1322-31.
63. Crouzet L, Gaultier E, Del'Homme C, et al. The hypersensitivity to colonic distension of IBS patients can be transferred to rats through their fecal microbiota. *Neurogastroenterol Motil.* 2013; 25: e272-82.

64. De Palma G, Lynch MDJ, Lu J, et al. Transplantation of fecal microbiota from patients with irritable bowel syndrome alters gut function and behavior in recipient mice. *Sci Transl Med*. 2017; 9: 01.
65. Edogawa S, Edwinson AL, Peters SA, et al. Serine proteases as luminal mediators of intestinal barrier dysfunction and symptom severity in IBS. *Gut*. 2019.
66. Han X, Lee A, Huang S, Gao J, Spence JR and Owyang C. *Lactobacillus rhamnosus* GG prevents epithelial barrier dysfunction induced by interferon-gamma and fecal supernatants from irritable bowel syndrome patients in human intestinal enteroids and colonoids. *Gut Microbes*. 2019; 10: 59-76.
